# Supplementary material for: Chitosan–Azide Nanoparticle Coating as a Degradation Barrier in Multilayered Polyelectrolyte Drug Delivery Systems
Source: MDPI journal article supplement (doi:10.3390/biom9100573), 2019-10-05
Supplement: s1 [file s1]

Supplement to

# Chitosan-azide nanoparticle coating as degradation barrier in multilayered polyelectrolyte drug delivery systems

Steffen Sydow <sup>1</sup>, Armin Aniol <sup>1</sup>, Christoph Hadler <sup>1</sup> and Henning Menzel <sup>1,\*</sup>

<sup>1</sup> Institute for Technical Chemistry, Braunschweig University of Technology, 38106 Braunschweig, Germany

\* Correspondence: h.menzel@tu-bs.de; Tel.: +49-531-391-5361

## Supplementary Materials:

**Purification of Chitosan:** Chitosan (DDA 75-85%) was purified by a method according to GAN ET AL. Chitosan was added to a 1 M NaOH and stirred at 70°C for 2h. Chitosan flakes were filtered off, washed with deionized water and were dissolved in 1% (w/v) acetic acid. Finally, the purified chitosan was obtained by dialyses of the filtrate (cutoff 10 kDa) against 0.1 M NaCL solution and deionized water following by subsequent lyophilization.

## Azide-“blocking”-middle layer

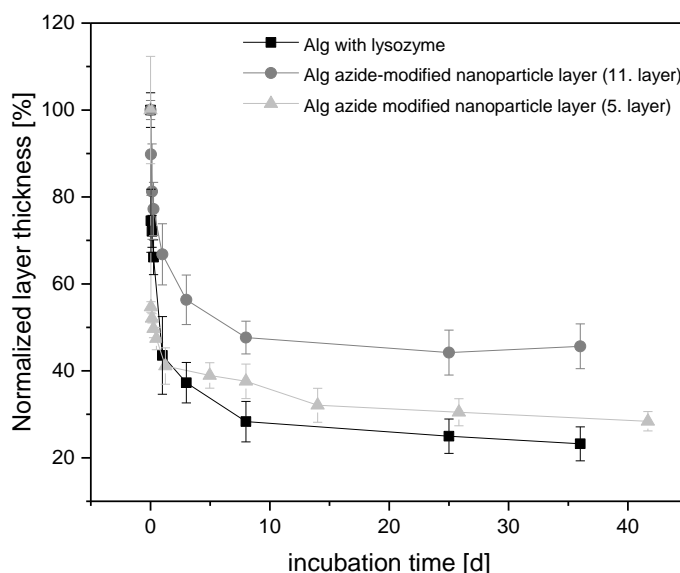

**Figure S1:** Degradation of CS(17)-TPP multilayer system (Alg) in PBS-puffer at 37°C. Lysozyme has been added to reach a concentration of 1,5 µg/mL. For CS-Az retarding, the 11<sup>th</sup> top layer was deposited by dipping in 1 mg/mL CS-Az-TPP NP solution and subsequently crosslinking under UV-light. For the intermediate blocking layer CS-Az-TPP NPs were deposited at 5<sup>th</sup> layer. Lysozyme was also added to the CS-Az experimental group. N > 3.

24

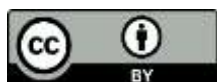

© 2019 by the authors. Submitted for possible open access publication under the terms and conditions of the Creative Commons Attribution (CC BY) license (<http://creativecommons.org/licenses/by/4.0/>).

25
